# Supplementary material for: Effectiveness of mRNA COVID-19 vaccines against symptomatic SARS-CoV-2 infections during the Delta variant epidemic in Japan: Vaccine Effectiveness Real-time Surveillance for SARS-CoV-2 (VERSUS)
Source: bioRxiv or medRxiv preprint supplement (doi:10.1101/2022.01.17.22269394), 2022-01-23
Supplement: Supplementary file [file media-2.pdf]

|                                                | 2021 |     |     |     |     |     |     |  |
|------------------------------------------------|------|-----|-----|-----|-----|-----|-----|--|
|                                                | Feb  | Mar | Apr | May | Jun | Jul | Aug |  |
| <b>BNT162b2</b>                                |      |     |     |     |     |     |     |  |
| <b>Market approval</b>                         |      |     |     |     |     |     |     |  |
| Approval for individuals aged $\geq 16$ years  |      |     |     |     |     |     |     |  |
| Approval for individuals aged 12–15 years      |      |     |     |     |     |     |     |  |
| <b>Vaccination program with public funding</b> |      |     |     |     |     |     |     |  |
| Healthcare professionals                       |      |     |     |     |     |     |     |  |
| Older adults aged $\geq 65$ years              |      |     |     |     |     |     |     |  |
| Individuals aged 12–64 years                   |      |     |     |     |     |     |     |  |
| <b>mRNA-1273</b>                               |      |     |     |     |     |     |     |  |
| <b>Market approval</b>                         |      |     |     |     |     |     |     |  |
| Approval for individuals aged $\geq 18$ years  |      |     |     |     |     |     |     |  |
| Approval for individuals aged 12–17 years      |      |     |     |     |     |     |     |  |
| <b>Vaccination program with public funding</b> |      |     |     |     |     |     |     |  |
| Older adults aged $\geq 65$ years              |      |     |     |     |     |     |     |  |
| Individuals aged 18–64 years                   |      |     |     |     |     |     |     |  |
| Individuals aged 12–17 years                   |      |     |     |     |     |     |     |  |
| <b>AZD1222</b>                                 |      |     |     |     |     |     |     |  |
| <b>Market approval</b>                         |      |     |     |     |     |     |     |  |
| Approval for individuals aged $\geq 18$ years  |      |     |     |     |     |     |     |  |
| <b>Vaccination program with public funding</b> |      |     |     |     |     |     |     |  |
| Options for individuals aged $\geq 40$ years   |      |     |     |     |     |     |     |  |

**Supplementary Figure 1:** Timeline of COVID-19 vaccine approval and administration in Japan. \*Vaccination of individuals aged 12 to 64 years prioritized those with underlying medical conditions.

The data source was the National Institute of Infectious Diseases, Japan and the Pharmaceuticals and Medica Devices Agency, Japan.
